# Supplementary material
Source: publisher figshare collection journal article supplement (https://tandf.figshare.com/ndownloader/files/20042591)
Supplement: Supplementary file 1 [file 20042591]

**Supplemental Table. Literature search strategy.**

| **#** | **Searches** | **Results** |
| --- | --- | --- |
| 1 | exp Phage Therapy/ | 849 |
| 2 | (((bacteriophage* or phage* or multiphage* or "multi-phage*" or "phage-based" or "bacteriophage-based") adj3 (pharma* or therap* or cocktail* or engineer* or prophylax* or treat* or intervention* or resistance or antibiotic* or adjuvant*)) or ((bacteriophage* or phage* or multiphage* or "multi-phage*" or "phage-based" or "bacteriophage-based") adj3 bacteria* adj3 interaction*)).ti,ab,hw,kw. | 8609 |
| 3 | 1 or 2 | 8609 |
| 4 | exp Wound Infection/ | 93297 |
| 5 | exp prosthesis infection/ or exp periprosthetic joint infection/ | 9071 |
| 6 | exp Prosthesis-Related Infections/ | 3153534 |
| 7 | (injur* or joint* or prosthe* or wound*).ti,ab,hw,kw. | 4470002 |
| 8 | 4 or 5 or 6 or 7 | 7297076 |
| 9 | 3 and 8 | 1637 |
| 10 | (bacteriophage* or phage* or multiphage* or "multi-phage*").ti,ab,hw,kw. | 158578 |
| 11 | exp Biofilms/ | 78798 |
| 12 | exp Drug Resistance, Multiple, Bacterial/ | 63763 |
| 13 | exp systems biology/ | 21325 |
| 14 | (((multidrug or "multi-drug") adj3 resist*) or (plankton* and infect*) or biofilm or biofilms or "systems biology").ti,ab,hw,kw. | 310164 |
| 15 | 11 or 12 or 13 or 14 | 319751 |
| 16 | 10 and 15 | 4165 |
| 17 | 9 or 16 | 5321 |
| 18 | limit 17 to yr="2007 -Current" | 4240 |
| 19 | limit 18 to (letter or conference abstract or editorial or erratum or note or addresses or autobiography or bibliography or biography or blogs or comment or dictionary or directory or interactive tutorial or interview or lectures or legal cases or legislation or news or newspaper article or overall or patient education handout or periodical index or portraits or published erratum or video-audio media or webcasts) [Limit not valid in CCTR,CDSR,Embase,Ovid MEDLINE(R),Ovid MEDLINE(R) Daily Update,Ovid MEDLINE(R) In-Process,Ovid MEDLINE(R) Publisher; records were retained] | 365 |
| 20 | 18 not 19 | 3875 |
| 21 | 8 and 20 | 1469 |
| 22 | remove duplicates from 21 | 1346 |
